# Supplementary material for: High-throughput analysis unveils a highly shared satellite DNA library among three species of fish genus Astyanax
Source: PubMed Central journal article supplement (PMC5635008; doi:10.1038/s41598-017-12939-7), 2017-10-05
Supplement: 41598_2017_12939_MOESM1_ESM.pdf [file 41598_2017_12939_MOESM1_ESM.pdf]

## Supplementary Information

High-throughput analysis unveils a highly shared satellite DNA library  
among three species of fish genus *Astyanax*

Duílio M. Z. de A. Silva<sup>1\*</sup>, Ricardo Utsunomia<sup>1</sup>, Francisco J. Ruiz-Ruano<sup>2</sup>, Sandro Natal Daniel<sup>3</sup>, Fábio Porto-Foresti<sup>3</sup>, Diogo Teruo Hashimoto<sup>4</sup>, Claudio Oliveira<sup>1</sup>, Juan Pedro M. Camacho<sup>2</sup>, Fausto Foresti<sup>1</sup>

<sup>1</sup>Departamento de Morfologia, Instituto de Biociências, Universidade Estadual Paulista - UNESP, Distrito de Rubião Junior, s/n, 18618-970, Botucatu, SP, Brazil.

<sup>2</sup>Departamento de Genética, Universidad de Granada, 18071, Granada, Spain.

<sup>3</sup>Departamento de Ciências Biológicas, Faculdade de Ciências, Universidade Estadual Paulista - UNESP, Campus de Bauru. 17033-360, Bauru, SP, Brazil.

<sup>4</sup>CAUNESP, Universidade Estadual Paulista - UNESP, Campus Jaboticabal, 14884-900, Jaboticabal, SP, Brazil.

\*Corresponding author: [duilio@ibb.unesp.br](mailto:duilio@ibb.unesp.br)

## Supplementary Figures

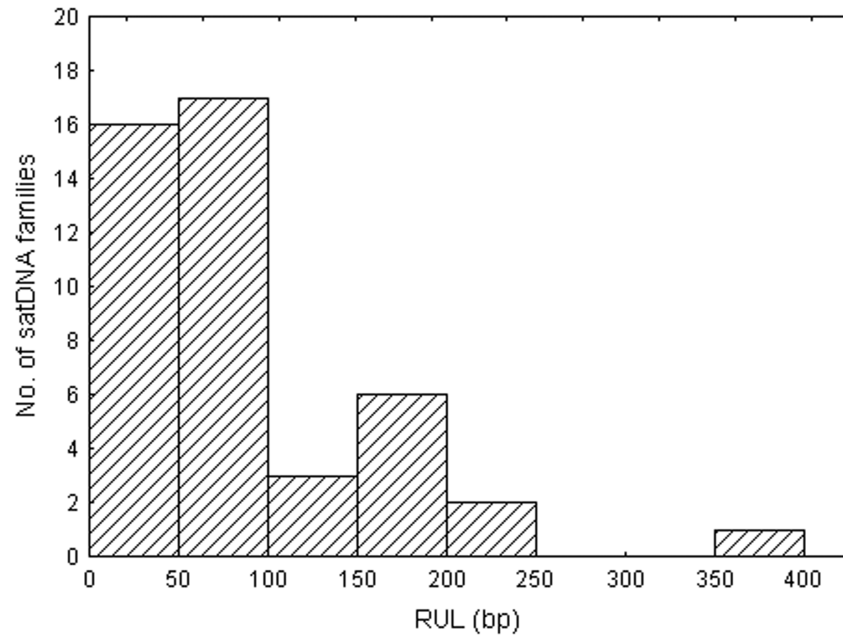

**Figure S1.** Frequency of satDNAs in each interval of repeat unit lengths (RUL) for the 45 satDNA families found in *A. paranae*. Note that 33 families showed RUL < 100 bp.

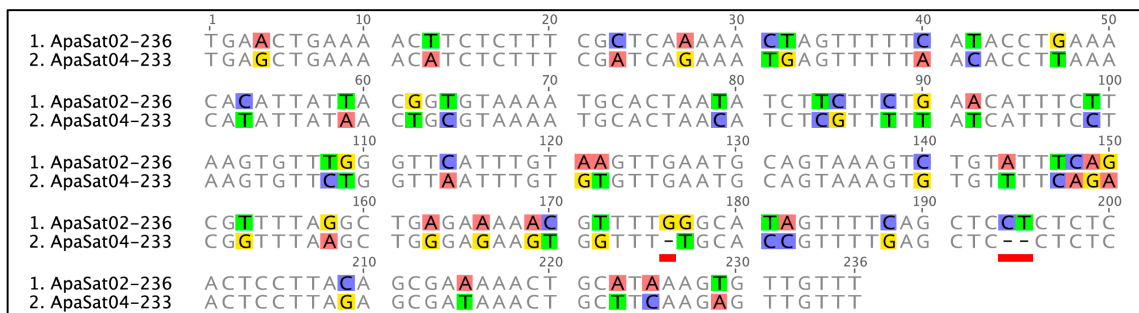

**Figure S2.** Alignment for the two satDNA families belonging to superfamily 1. Indels are indicated by the red bars.

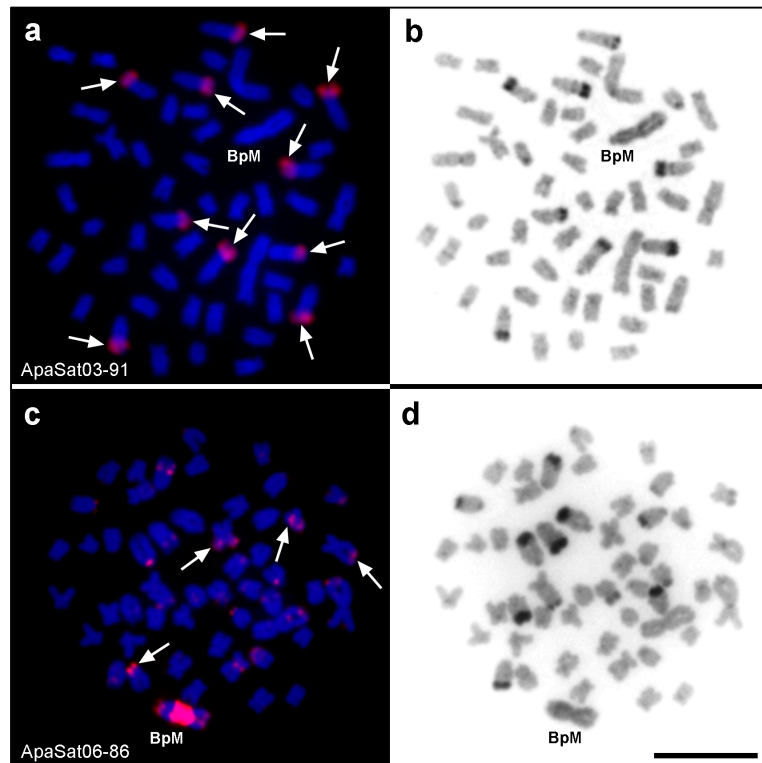

**Figure S3.** Mitotic metaphase cells of *A. paranae* after sequential satDNA FISH (a, c) and C-banding (b, d). Note the presence of satDNA clusters (arrows) on distal heterochromatin (a, b) and also on euchromatic regions (c, d). Bar = 10  $\mu$ m.

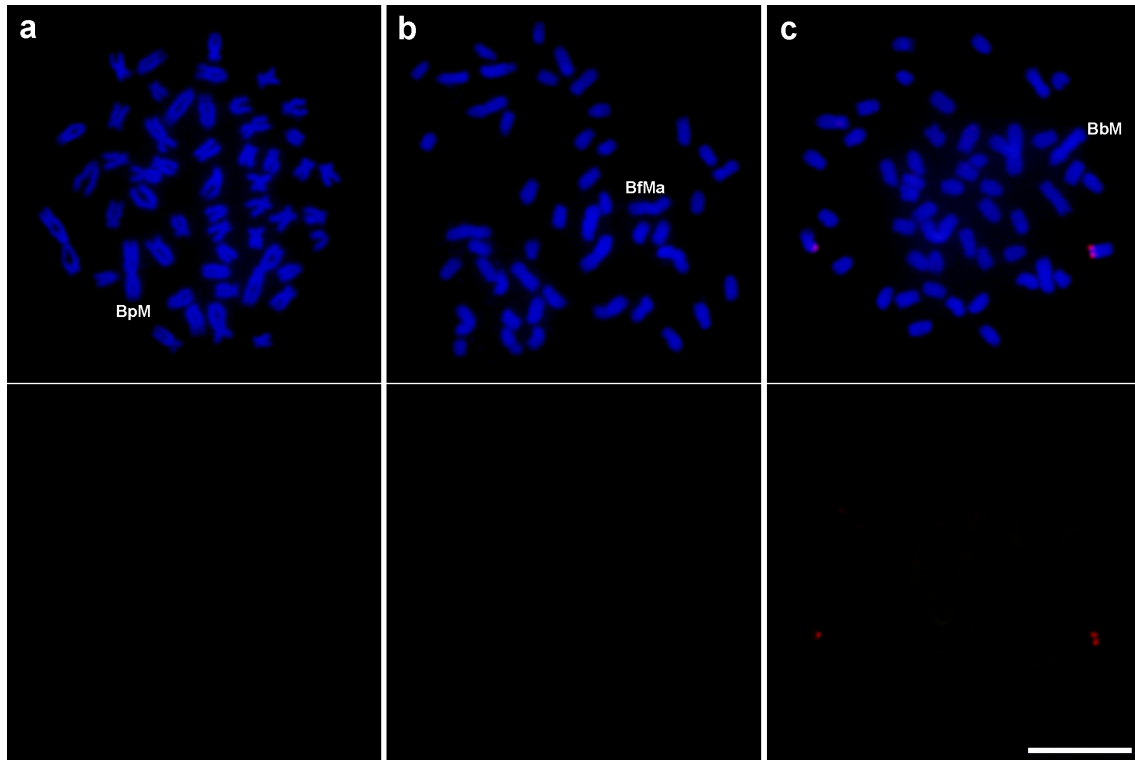

**Figure S4.** Mitotic metaphase cells of *A. paranae* (a), *A. fasciatus* (b) and *A. bockmanni* (c) showing the chromosome distribution of the ApaSat36-21 satDNA. The FISH signals are shown in red and are merged with DAPI in the upper panel. Note that only *A. bockmanni* harbour the satDNA clustered on the A chromosomes. Bar = 10  $\mu$ m.

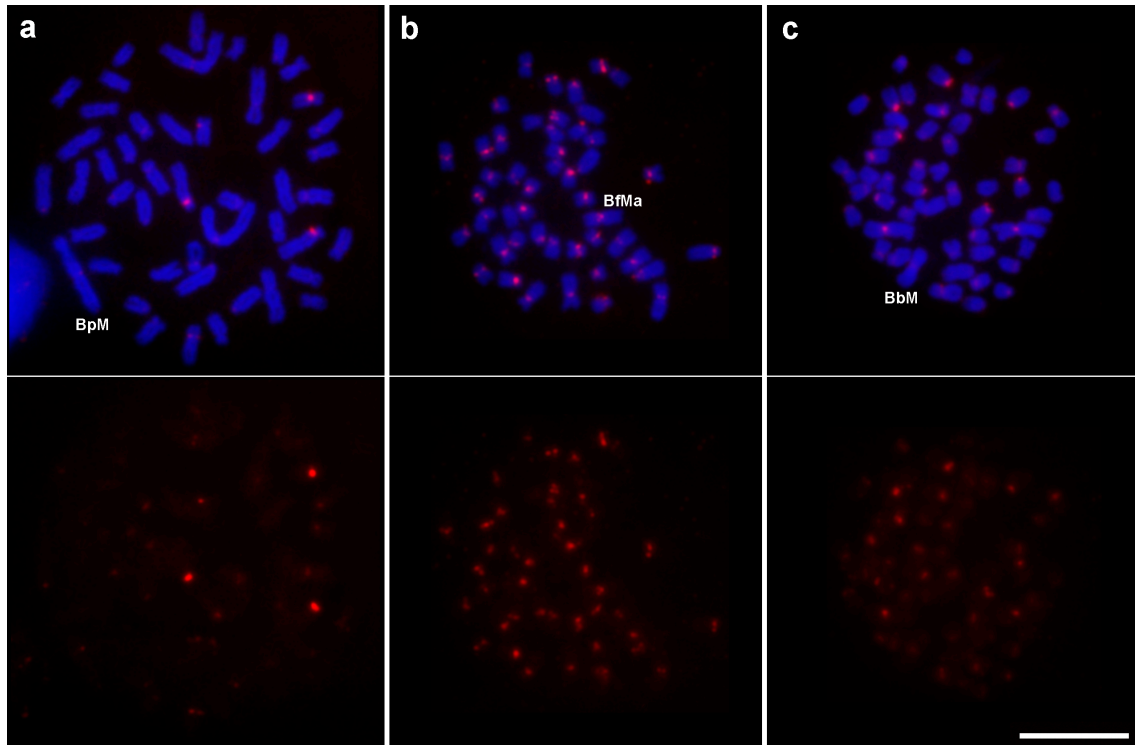

**Figure S5.** Mitotic metaphase cells of *A. paranae* (a), *A. fasciatus* (b) and *A. bockmanni* (c) showing the chromosome distribution for the ApaSat04-233 satDNA. The FISH signals are shown in red and are merged with DAPI in the upper panel. Bar = 10  $\mu$ m.

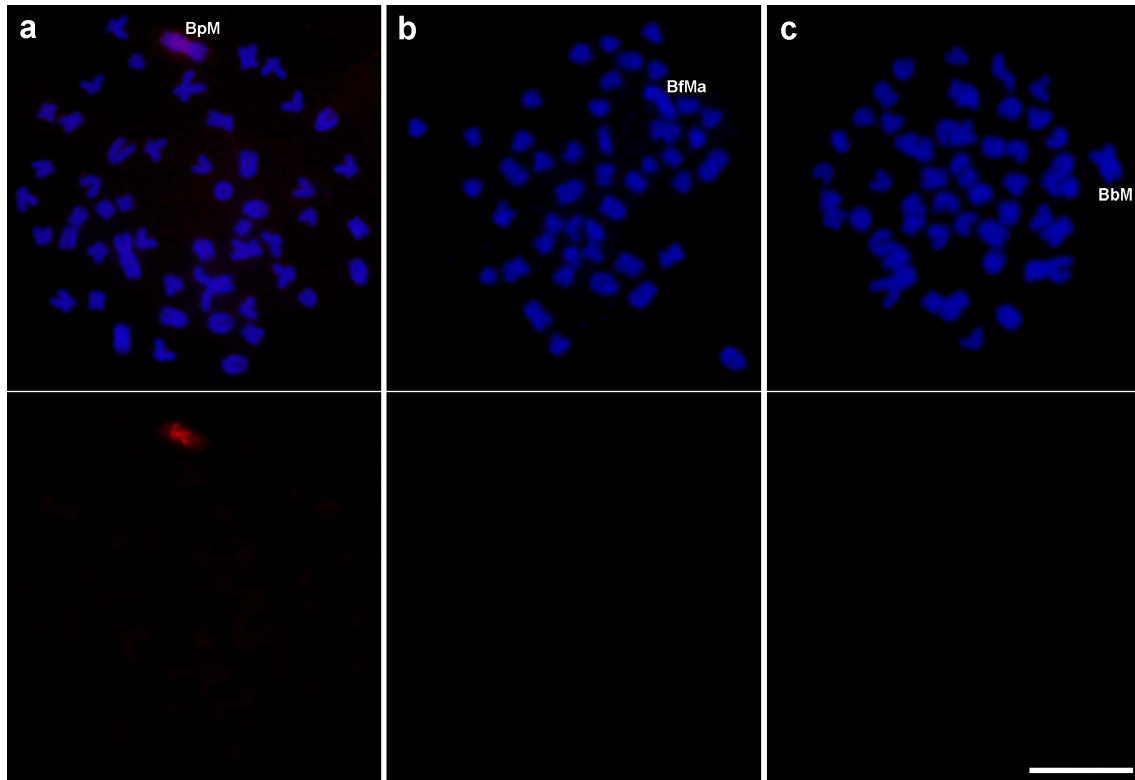

**Figure S6.** Mitotic metaphase cells showing the presence of a large FISH signal for the ApaSat44-21 satDNA on the BpM chromosome in *A. paranae* (a). Note the absence of FISH signals for this satellite on the A chromosomes of *A. paranae*, and also on the A and B chromosomes of *A. fasciatus* (b) and *A. bockmanni* (c). The FISH signals are shown in red and are merged with DAPI in the upper panel. Bar = 10  $\mu$ m.

## Supplementary Table

**Table S1. Primers designed in this study to amplify each satDNA family.**

| SatDNA       | Forward                      | Reverse                     |
|--------------|------------------------------|-----------------------------|
| ApaSat01-51  | TCACTTTTCGGACTTACCACTGGT     | AATGACTAAGTCCAACCTGGT       |
| ApaSat02-236 | GCTGAAAACATATGCCCAAAACGT     | GCTCCTCTCTCACTCCTTACAGCG    |
| ApaSat03-91  | CGACTGTGGTATGCATTCTGAACA     | TAAACGCACCCGCGGATGGC        |
| ApaSat04-233 | GCACCGTTTTGAGCTCCTCT         | GCAAACCACCTTCTCCCAGCT       |
| ApaSat06-86  | CCCAGCCAGTGCACCAGTAT         | GGGGCCGGGGGTGTCAAAAC        |
| ApaSat08-35  | GTTTTAAAGGACGGTAGACTCT       | ACAGAAAAAAGTCGTAGAGTCT      |
| ApaSat09-21  | TCTCAAAAATAATGACTTAGTATCTCA  | TACTAAGTCATTATTTTGAGATACTAA |
| ApaSat11-22  | AGGACACTTGGAGATGCCCA         | GGGCATCTCCAAGTGTCTT         |
| ApaSat12-69  | CGGTCAAAAGTGGAGTCCCCT        | CCGTACCCATGGTAGACCAAGTGGG   |
| ApaSat13-22  | AAAGACCCATGGATGGAGGT         | CCATCCATGGGTCTTTTTAA        |
| ApaSat14-184 | TGATTTTGCAGGCCGGAAGCCT       | TCAGTCTTGGTCTTTGGCCA        |
| ApaSat15-51  | TGGGGTTGATAACAGATGGATGGT     | AACCAGCACAGCACCATCCA        |
| ApaSat16-54  | TGTTTCTCCATCAGCAGCCGG        | TCTCTCTCAGACTCCGGCTGC       |
| ApaSat17-365 | TGACCGGAAATGGGGGCTGC         | AGGCAGACCAGTGAGGTACCGT      |
| ApaSat18-58  | GAACGAGAGCGCCAGCCCTG         | CTCAGTGATTCTTCACTCACTC      |
| ApaSat19-77  | CGCTTTTAAACAGTTAGACTGAGT     | CGCATAATTCCACTATTTACACA     |
| ApaSat20-18  | ACACACACACTCTCTCTCACACACA    | TGTGAGAGAGAGTGTGTGTGTGAGA   |
| ApaSat21-68  | CGAAGCACAGGAGAGCAGTCTT       | TCGTGAAGGAGGACATTGACT       |
| ApaSat22-63  | GAACAAGGGCTGTAGCTGCACT       | ACTGTTCTGTAGTGTGTAGTGCAGC   |
| ApaSat23-37  | ACAGAGTTACAGCAGGAGCCGG       | GCTGAGGGGAAACCGGCTCC        |
| ApaSat24-78  | TCAGTTGTAAGTGTGGAGGAGCT      | ACCTCCACAACAGCTGCTCCA       |
| ApaSat25-27  | TGGGTCAGGATAAGGGAGAGGA       | TTATCCTGACCCAACTATTCTT      |
| ApaSat26-195 | TCTGAACCAGCCAAAATGGGC        | TTTTAATGAGCTGAAACAGCA       |
| ApaSat27-178 | CCGAAGGTCGCCGTTTCGAG         | TCCGAAGTCTCCGAGGGCCG        |
| ApaSat28-52  | GCCTGAGTATTGTAGTGCTGCTGC     | CCTGCACACACTGCAGCAGC        |
| ApaSat29-52  | AGGAGTGTTTATTGAGGTTGT        | AGGAGATATTAGTCCATAAAACAACC  |
| ApaSat30-50  | ACCAAGTAGCTAATGTTACCTAGCT    | TGGTTAAAAAAGCACTGGGA        |
| ApaSat31-165 | CCCCCTGTGTTCTCAGAGAT         | ACCTAAGAAAAGTGGTTCCCCCT     |
| ApaSat32-85  | TCACATCTCCAGCACTCACTGA       | TGTTGTCTCTTCACTGGGTGA       |
| ApaSat33-112 | AGGACGTTACACACATCTGT         | AGAGTGGTCAGTGTGTGTGA        |
| ApaSat34-59  | GCTGGACGGTAGCTTCGCGG         | CACGGGATGGAACCCAGGGGA       |
| ApaSat35-37  | CCAGTAATGAACCTCAGTGCAGAGT    | GGACCCAGTGTATCACTCTGCA      |
| ApaSat36-21  | TAAACTGAACCGCGGATCTT         | AGATCCGCGGTTCACTTTAA        |
| ApaSat37-38  | ACTGTCTCTACAGACCCGCACA       | TGTGGGTTGATGGTGTGCGGG       |
| ApaSat38-107 | CCCACCACCCAGAGGTTCTGA        | GGGGGAAGGAGTTGGCCTACG       |
| ApaSat39-32  | TAGATCAGTCCAGCTTGATG         | AGTCCCTCTCCAACATCAAGC       |
| ApaSat40-189 | TTACATGCTATGTTACAGGGTCA      | AATGAATGGTGAATTTGCACT       |
| ApaSat41-33  | TCCTCCGCCTCGGACTCAGC         | ATCCGCAGGCAGCGCTGAG         |
| ApaSat42-90  | ACTCCTAGAGAAGAACACAGT        | ACAGCAGATCATAACCACAGT       |
| ApaSat43-61  | TGTTCAAGTAAAACAGTAAATGTTGTGT | GCTAAACGTCCAAACACAACA       |
| ApaSat44-21  | AGGGGAGTGTGCGGAGACAG         | TCTCGGACACTCCCCTACT         |
| ApaSat45-113 | CCTCTGCAGGTTGTATTATTGT       | AGGATTTATAGAAGAATCTGTTCTTT  |
